# Supplementary material for: Selective sensing of Hg2+ ions by optical and colorimetric methods using gold nanorods embedded in a functionalized silicate sol–gel matrix
Source: Royal Society of Chemistry journal article supplement (doi:10.1039/c4ta01363h), 2014-01-01
Supplement: c4ta01363h1.pdf [file c4ta01363h1.pdf]

**Selective sensing of Hg<sup>2+</sup> ions by optical and colorimetric methods using gold  
nanorods embedded in functionalized silicate sol–gel matrix**

Subramaniam Jayabal, Ramasamy Sathiyamurthi and Ramasamy Ramaraj\*

*School of Chemistry,  
Centre for Photoelectrochemistry,  
Madurai Kamaraj University,  
Madurai-625021, India.*

*\*Corresponding author: Tel: +91- 452-2459084;  
E-mail: ramarajr@yahoo.com (R. Ramaraj)*

**SUPPLEMENTARY INFORMATION**

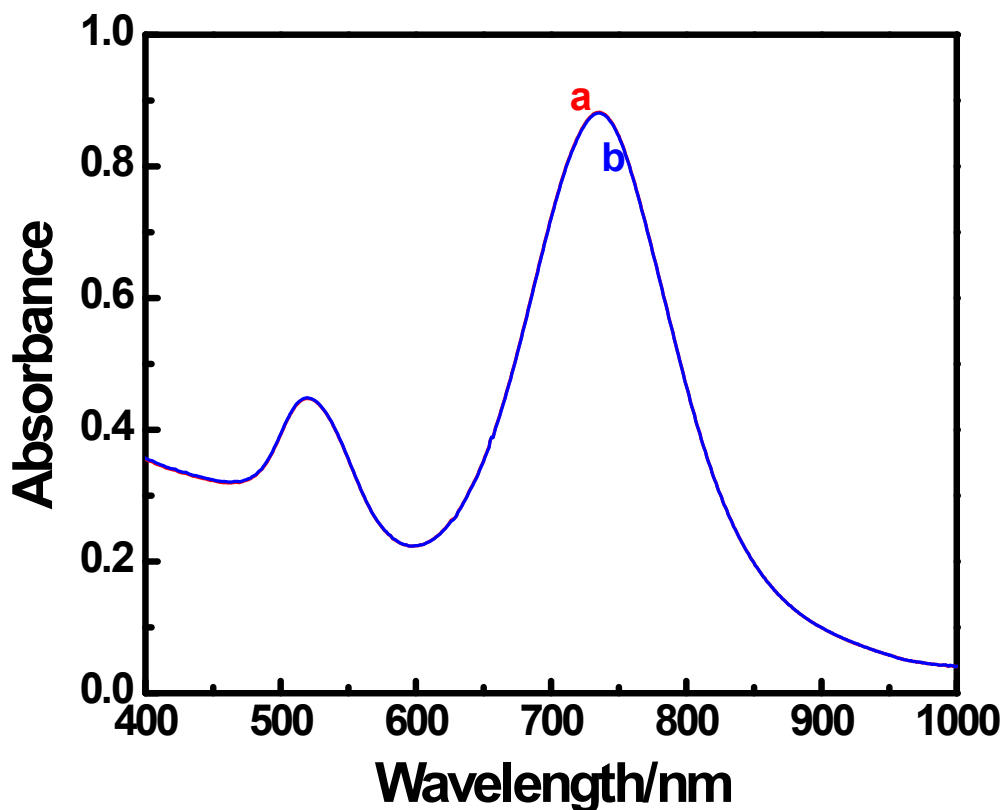

Fig. S1 Absorption spectra of Au-TPDT NRs (a) and Au-TPDT NRs after the addition of 5  $\mu$ L of water (b).

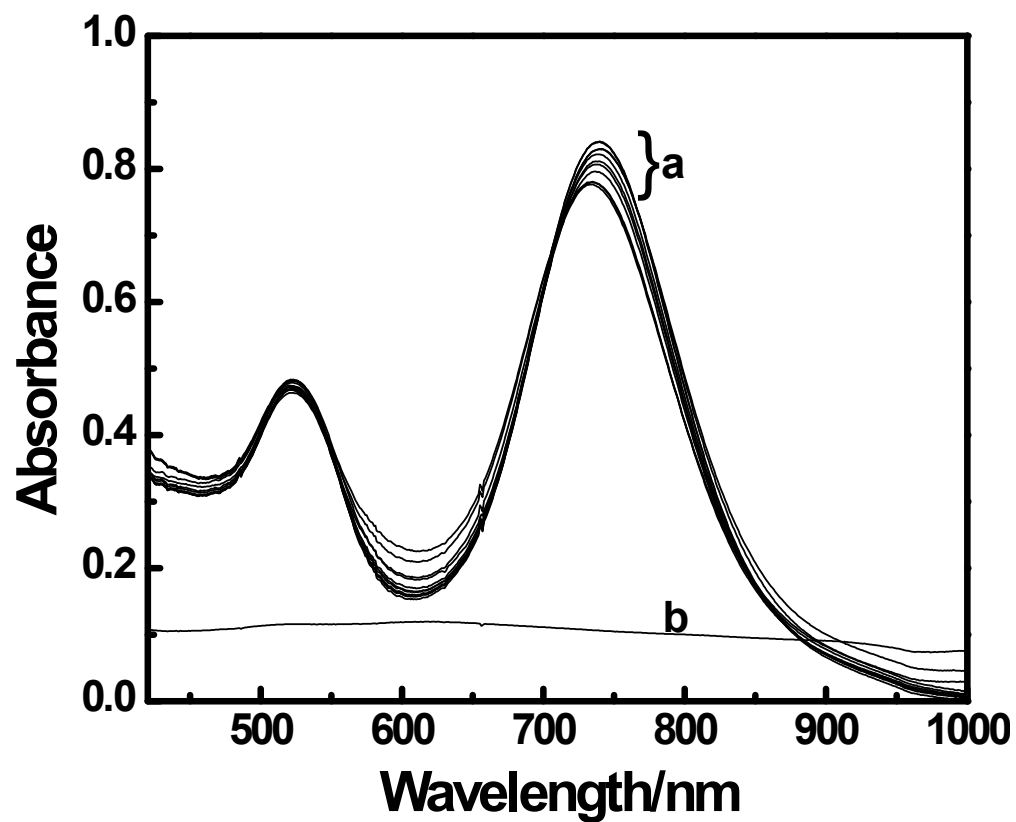

Fig. S2 Absorption spectral changes of LSPR band upon each addition of 50  $\mu\text{M}$  of other environmentally relevant metal ions one by one ( $\text{Cd}^{2+}$ ,  $\text{Pb}^{2+}$ ,  $\text{Mg}^{2+}$ ,  $\text{Ca}^{2+}$ ,  $\text{Zn}^{2+}$ ,  $\text{Mn}^{2+}$ ,  $\text{Co}^{2+}$ ,  $\text{Fe}^{2+}$ ,  $\text{Fe}^{3+}$ ,  $\text{Cu}^{2+}$  and  $\text{Ni}^{2+}$ ) (a) in the same Au-TPDT NRs solution as a mixed solution and finally upon the addition of 30  $\mu\text{M}$   $\text{Hg}^{2+}$  ions (b) to the same Au-TPDT NRs solution.

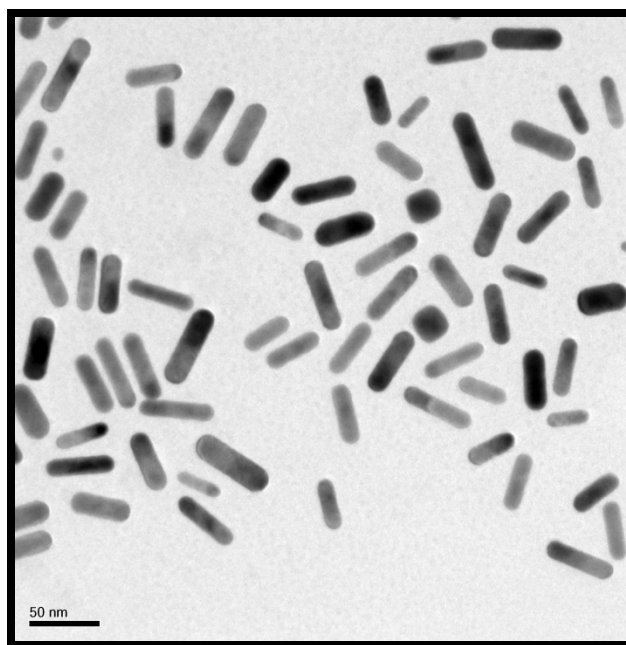

Fig. S3 TEM image of Au-TPDT NRs after the addition of 8  $\mu\text{M}$   $\text{Hg}^{2+}$  ions.

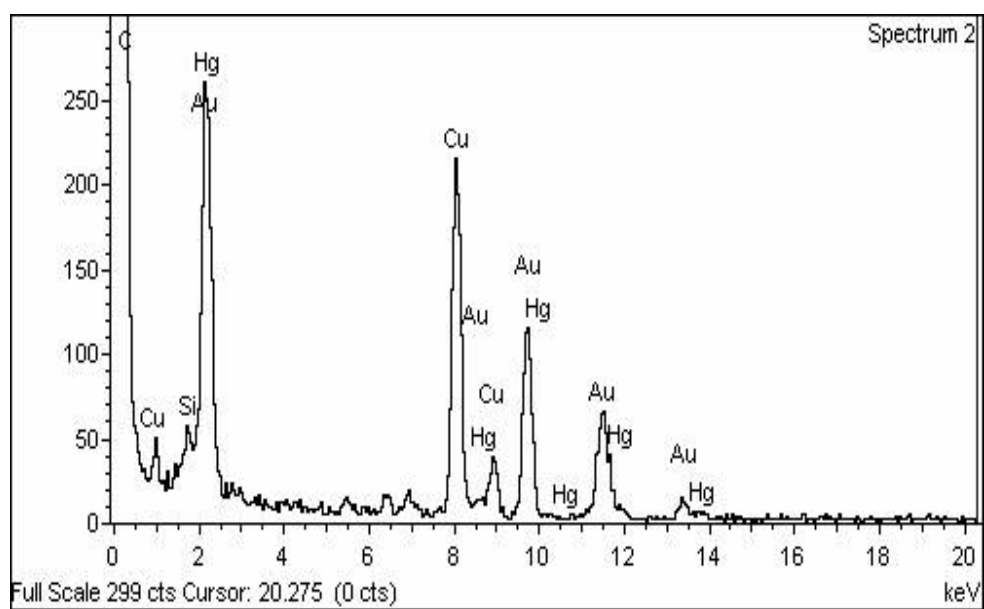

Fig. S4 EDS analysis of Au-TPDT NRs after the addition of 20  $\mu\text{M}$   $\text{Hg}^{2+}$  ions.

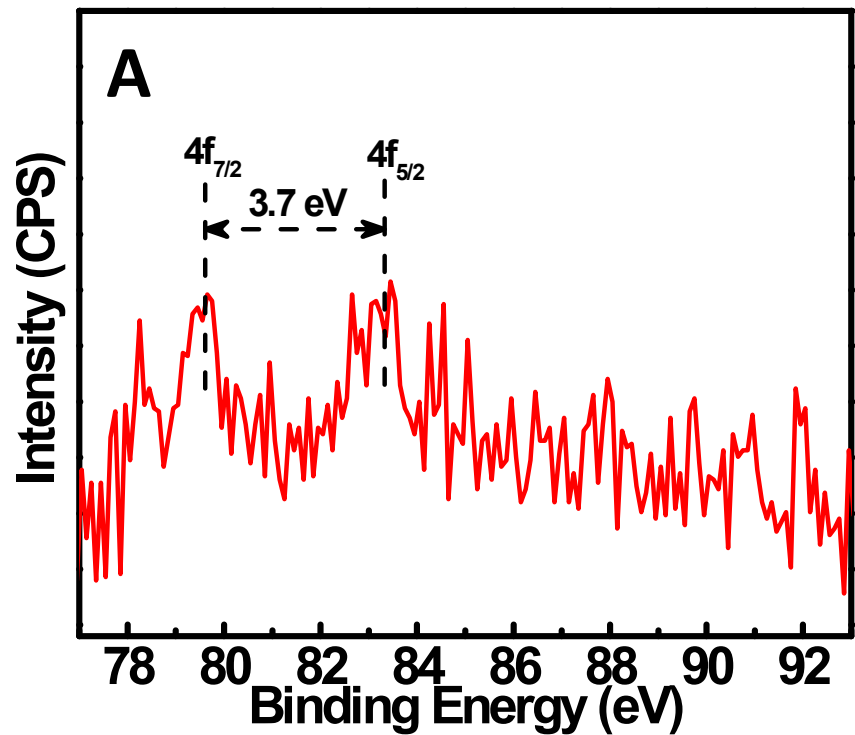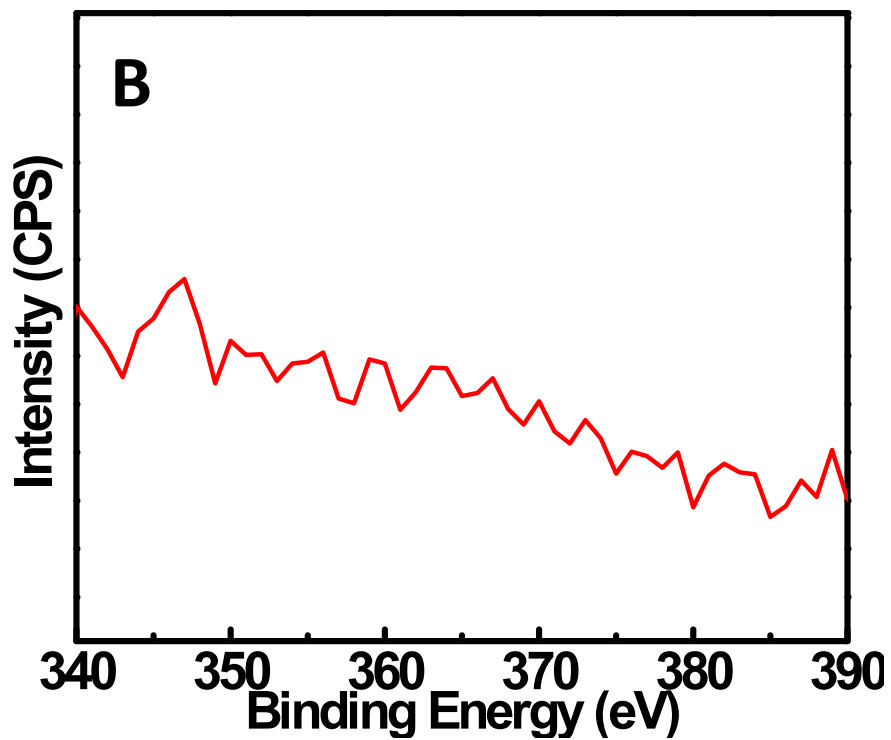

Fig. S5 XPS analysis of Au-TPDT NRs for (A) Au 4f and (B) Hg 4d regions.

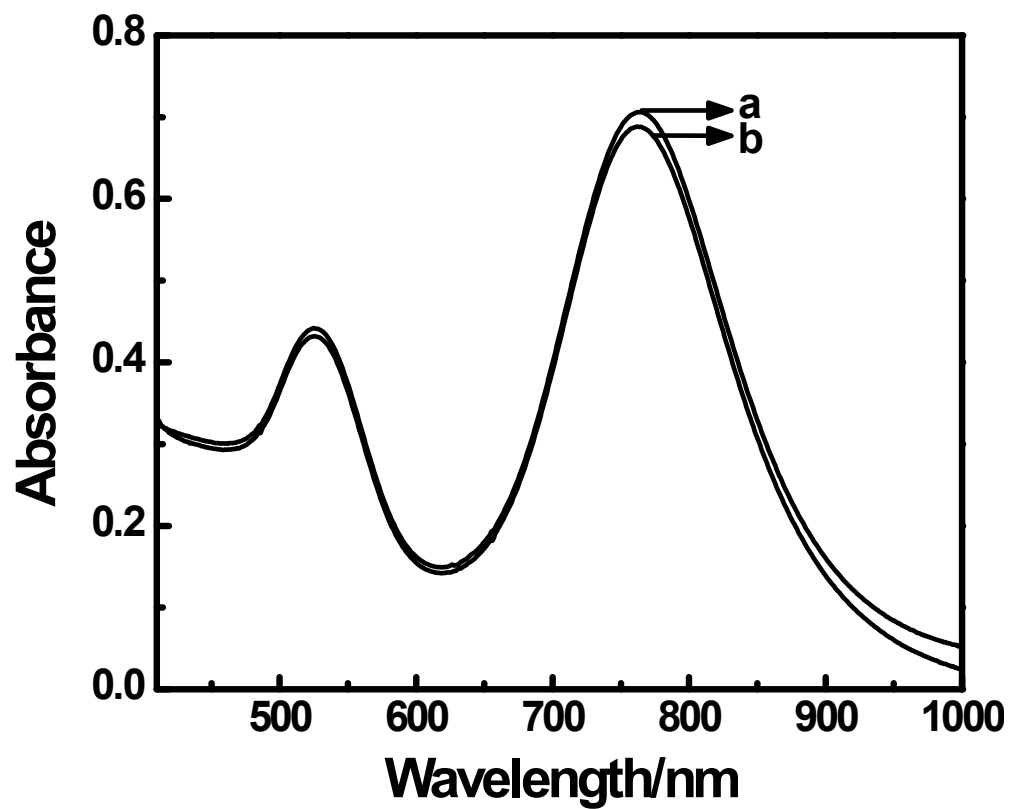

Fig. S6 Absorption spectra of Au NRs (a) and Au NRs after the addition of 20  $\mu\text{M}$   $\text{Hg}^{2+}$  ions (b).
